# Supplementary material
Source: Springer Nature journal article supplement (https://www.springermedizin.de/resource/supplementary/12960_2012_321_MOESM1_ESM.pdf/9569850)

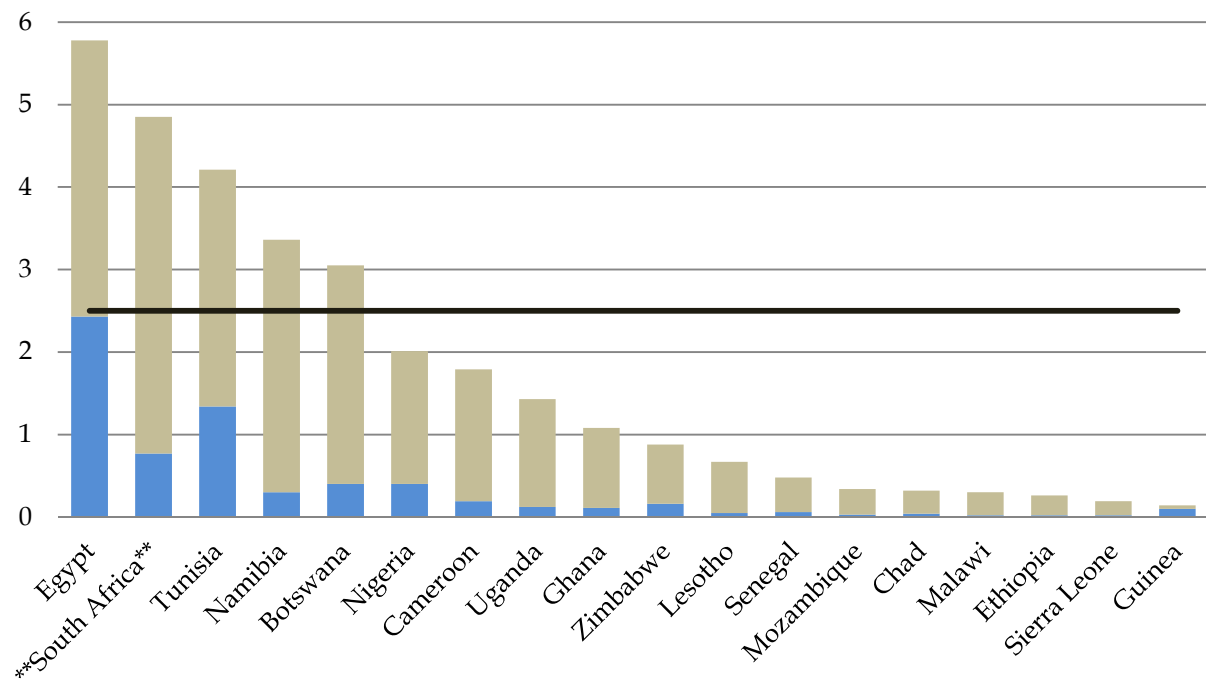

■ Physicians 
 ■ Nurses & midwives 
 — Joint Learning Initiative (2004) 'critical' level

Supplement: MOESM1 [file 9569850]
